# Supplementary material for: Cost and social distancing dynamics in a mathematical model of COVID-19 with application to Ontario, Canada
Source: bioRxiv or medRxiv preprint supplement (doi:10.1101/2020.10.21.20217158), 2021-01-13
Supplement: Supplementary file [file media-1.pdf]

## Supplementary Material: Additional Figures

We plot the active cases (tested and actual cases) along with the cost for each of the 25 scenarios considered in Figure 3 of the main text. These are plotted in Figure 1 for all cases of  $M_c^*/4$ , Figure 2 for all cases of  $M_c^*/2$ , Figure 3 for all cases of  $M_c^*$ , Figure 4 for all cases of  $2M_c^*$ , and Figure 5 for all cases of  $4M_c^*$ .

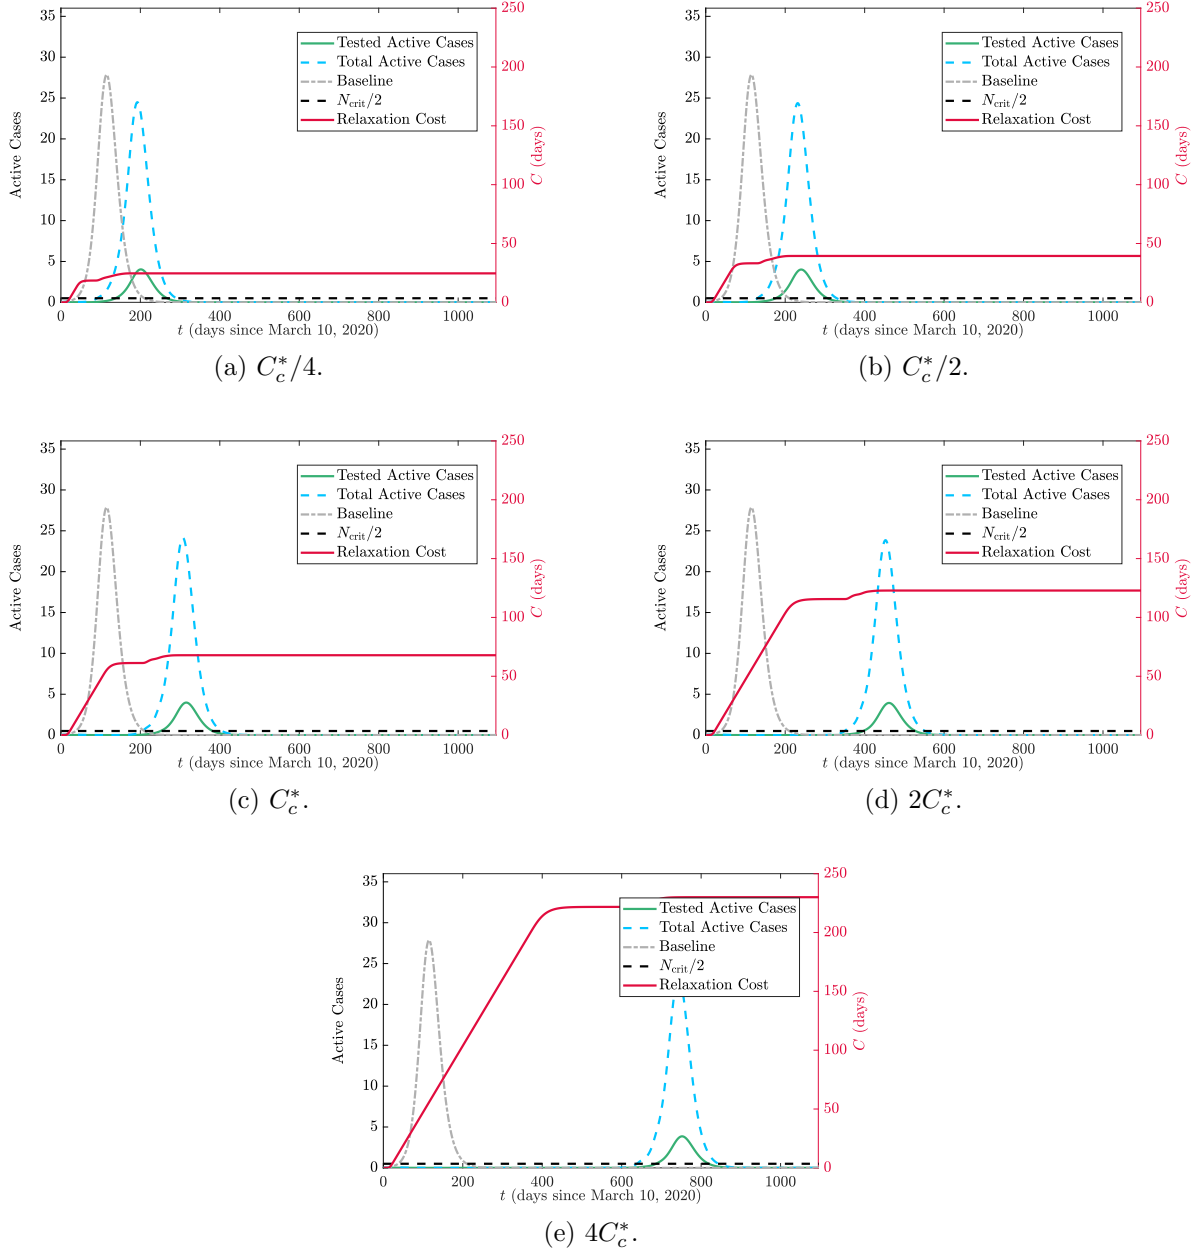

Figure 1: Tested active cases (green solid), total active cases (blue dashed) and relaxation cost (red solid) for  $M_c^*/4$  and varying  $C_c$ . The grey curve represents the baseline case of no implementation of social distancing (and thus no cost) and the black dashed line is the critical threshold  $N_{\text{crit}}/2$ . Case values are scaled by  $N_{\text{crit}}$ .

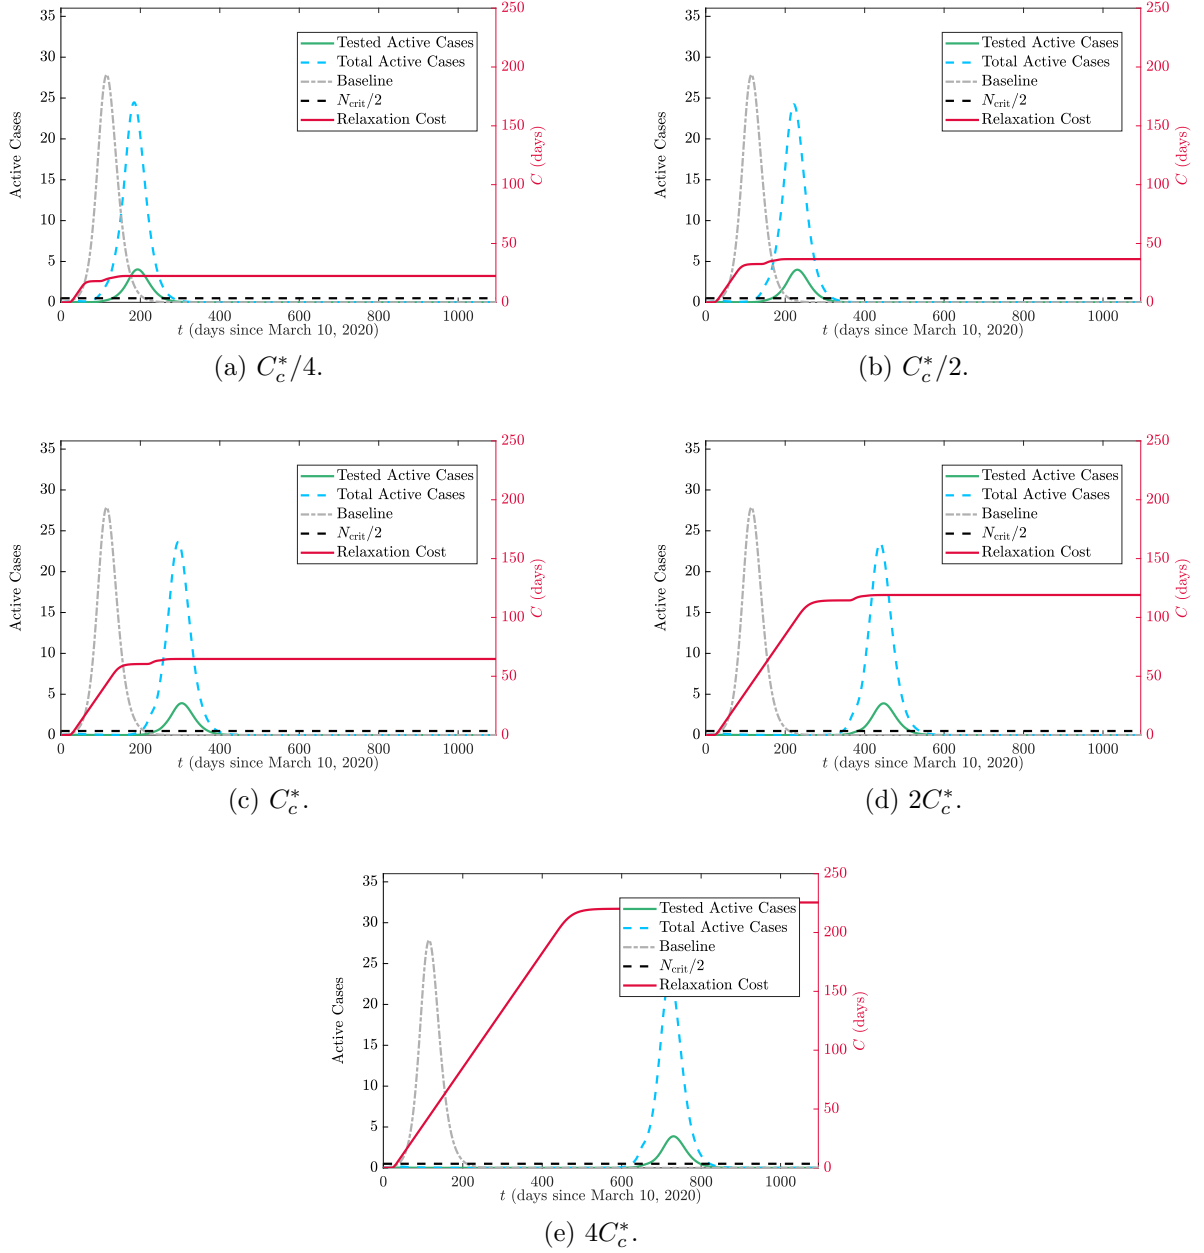

Figure 2: Tested active cases (green solid), total active cases (blue dashed) and relaxation cost (red solid) for  $M_c^*/2$  and varying  $C_c$ . The grey curve represents the baseline case of no implementation of social distancing (and thus no cost) and the black dashed line is the critical threshold  $N_{\text{crit}}/2$ . Case values are scaled by  $N_{\text{crit}}$ .

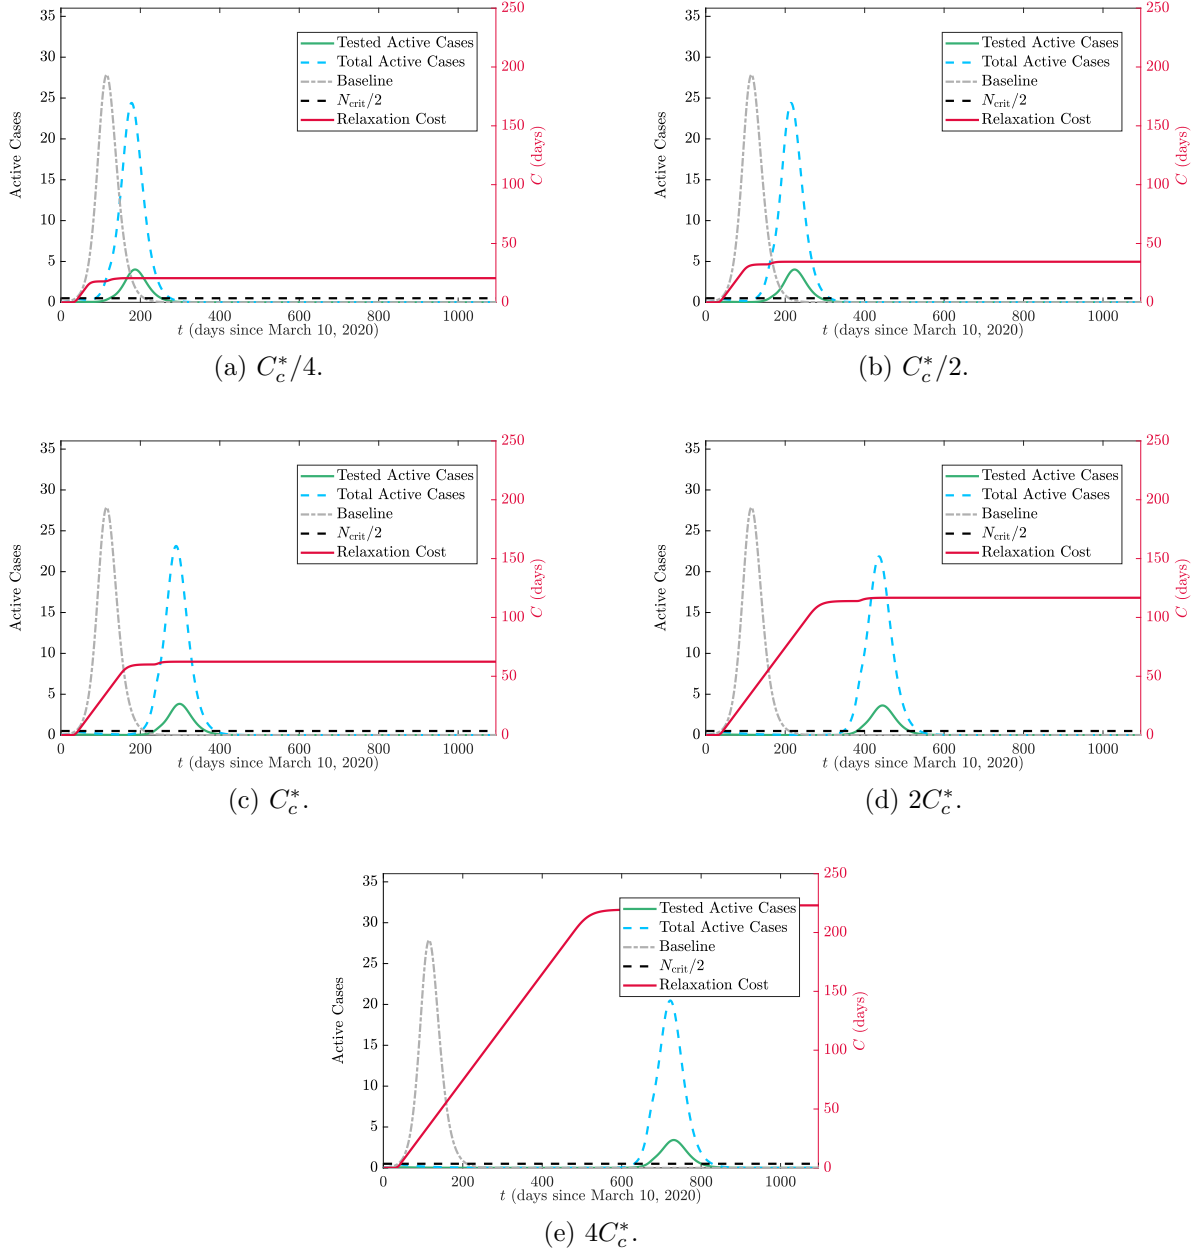

Figure 3: Tested active cases (green solid), total active cases (blue dashed) and relaxation cost (red solid) for  $M_c^*$  and varying  $C_c$ . The grey curve represents the baseline case of no implementation of social distancing (and thus no cost) and the black dashed line is the critical threshold  $N_{\text{crit}}/2$ . Case values are scaled by  $N_{\text{crit}}$ .

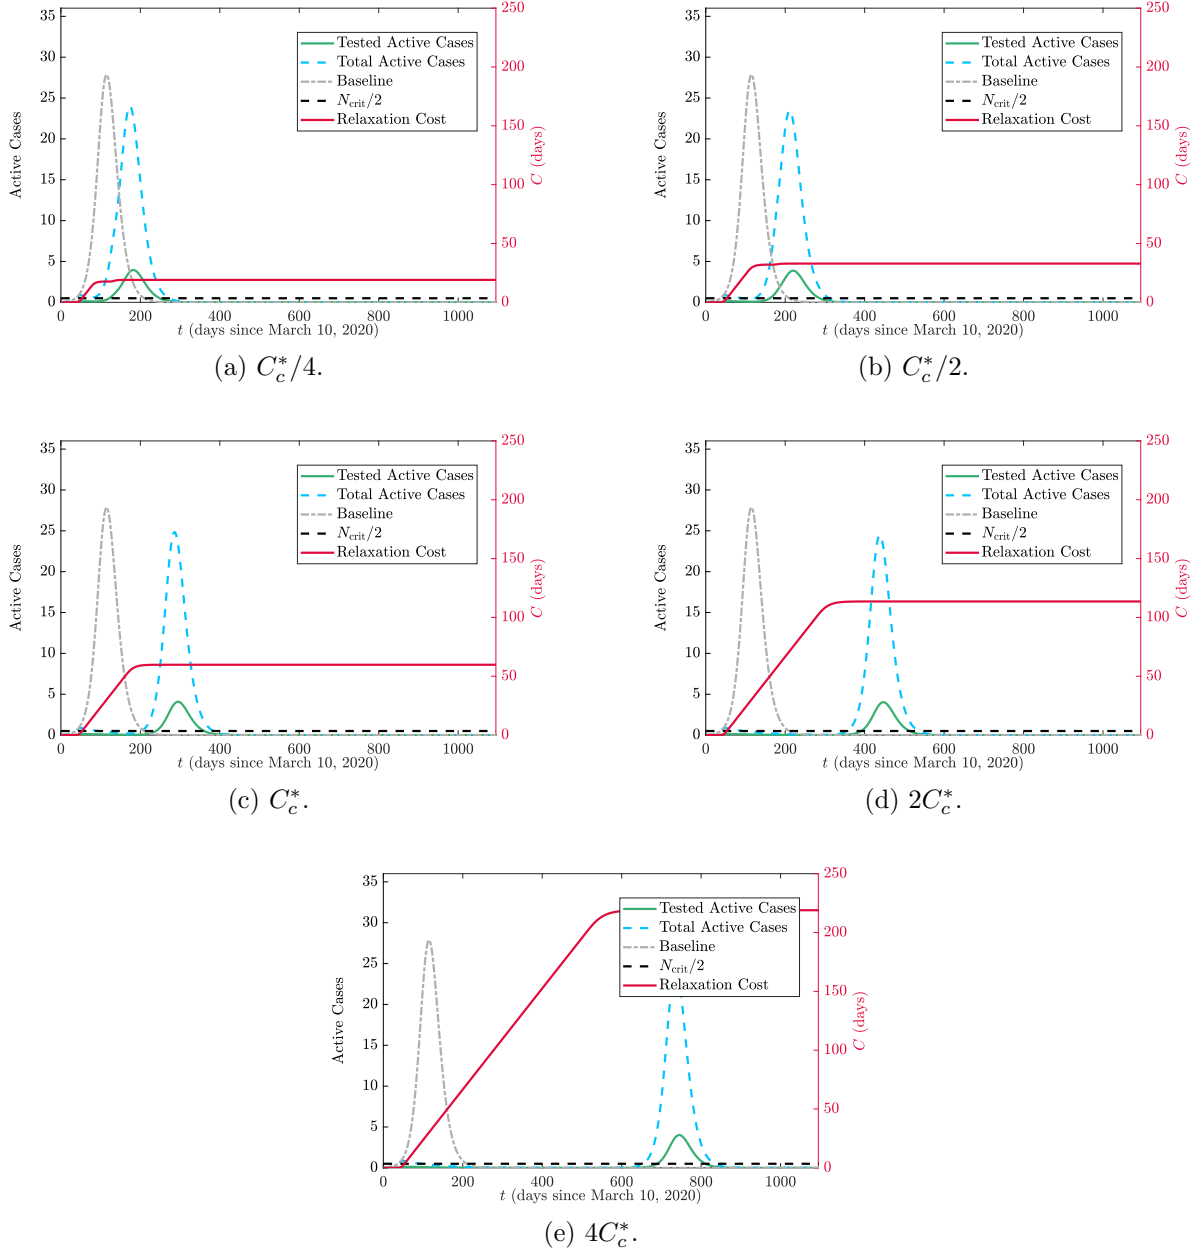

Figure 4: Tested active cases (green solid), total active cases (blue dashed) and relaxation cost (red solid) for  $2M_c^*$  and varying  $C_c$ . The grey curve represents the baseline case of no implementation of social distancing (and thus no cost) and the black dashed line is the critical threshold  $N_{\text{crit}}/2$ . Case values are scaled by  $N_{\text{crit}}$ .

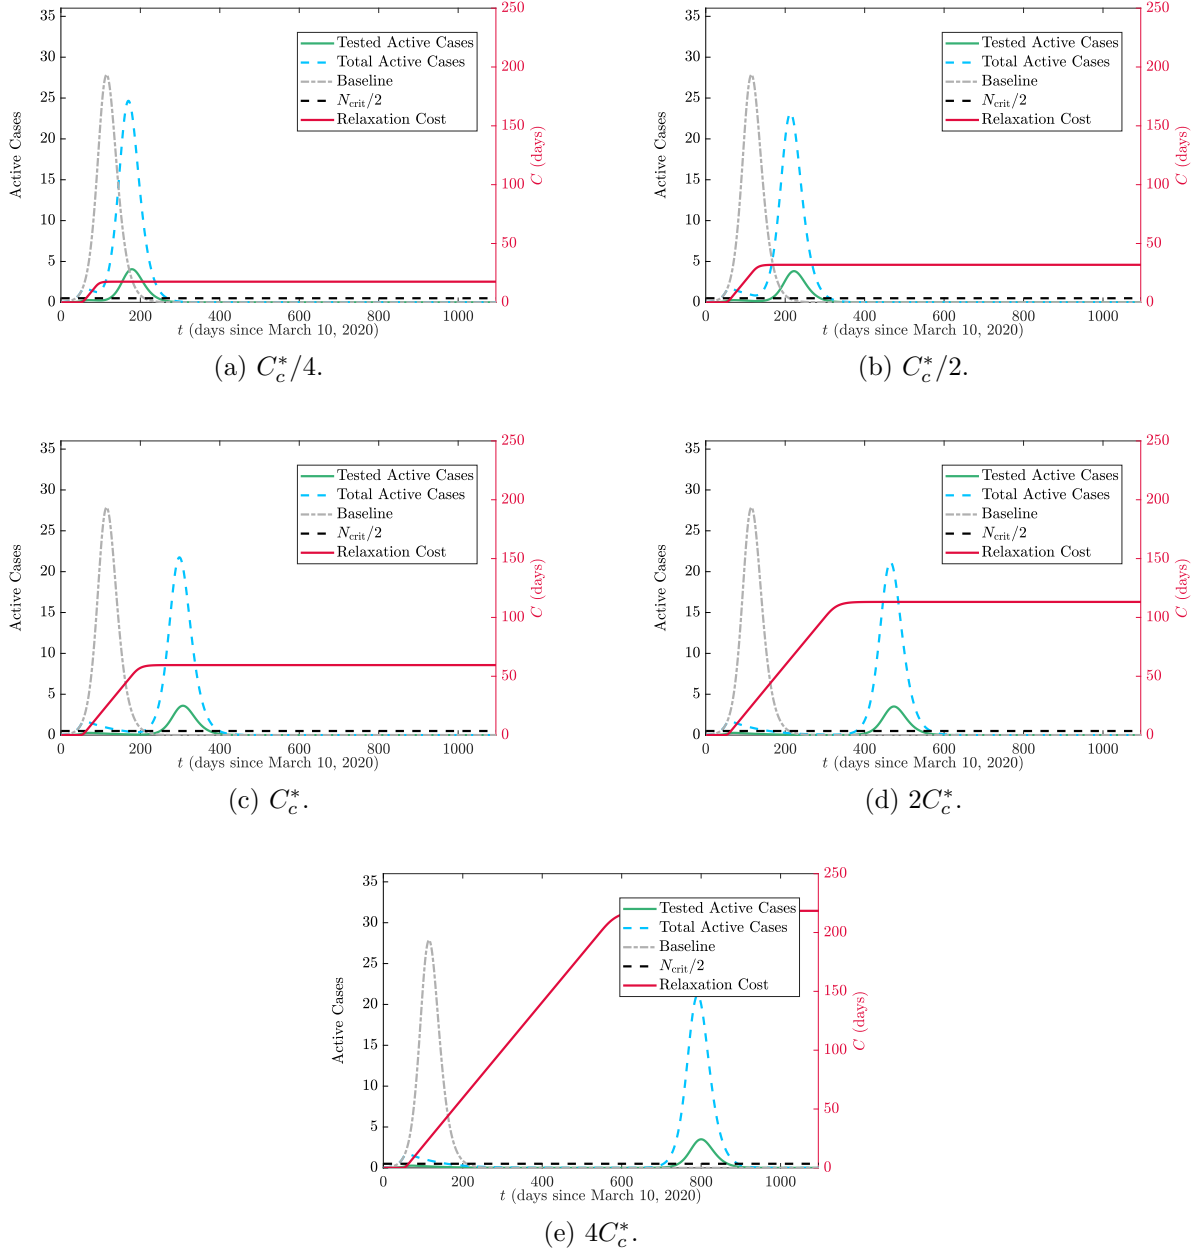

Figure 5: Tested active cases (green solid), total active cases (blue dashed) and relaxation cost (red solid) for  $4M_c^*$  and varying  $C_c$ . The grey curve represents the baseline case of no implementation of social distancing (and thus no cost) and the black dashed line is the critical threshold  $N_{\text{crit}}/2$ . Case values are scaled by  $N_{\text{crit}}$ .

We also plot the populations in each of the two social distancing classes for each of the 25 scenarios considered in Figure 3 of the main text. These are plotted in Figure 6 for social distancing class 1 and Figure 7 for social distancing class 2.

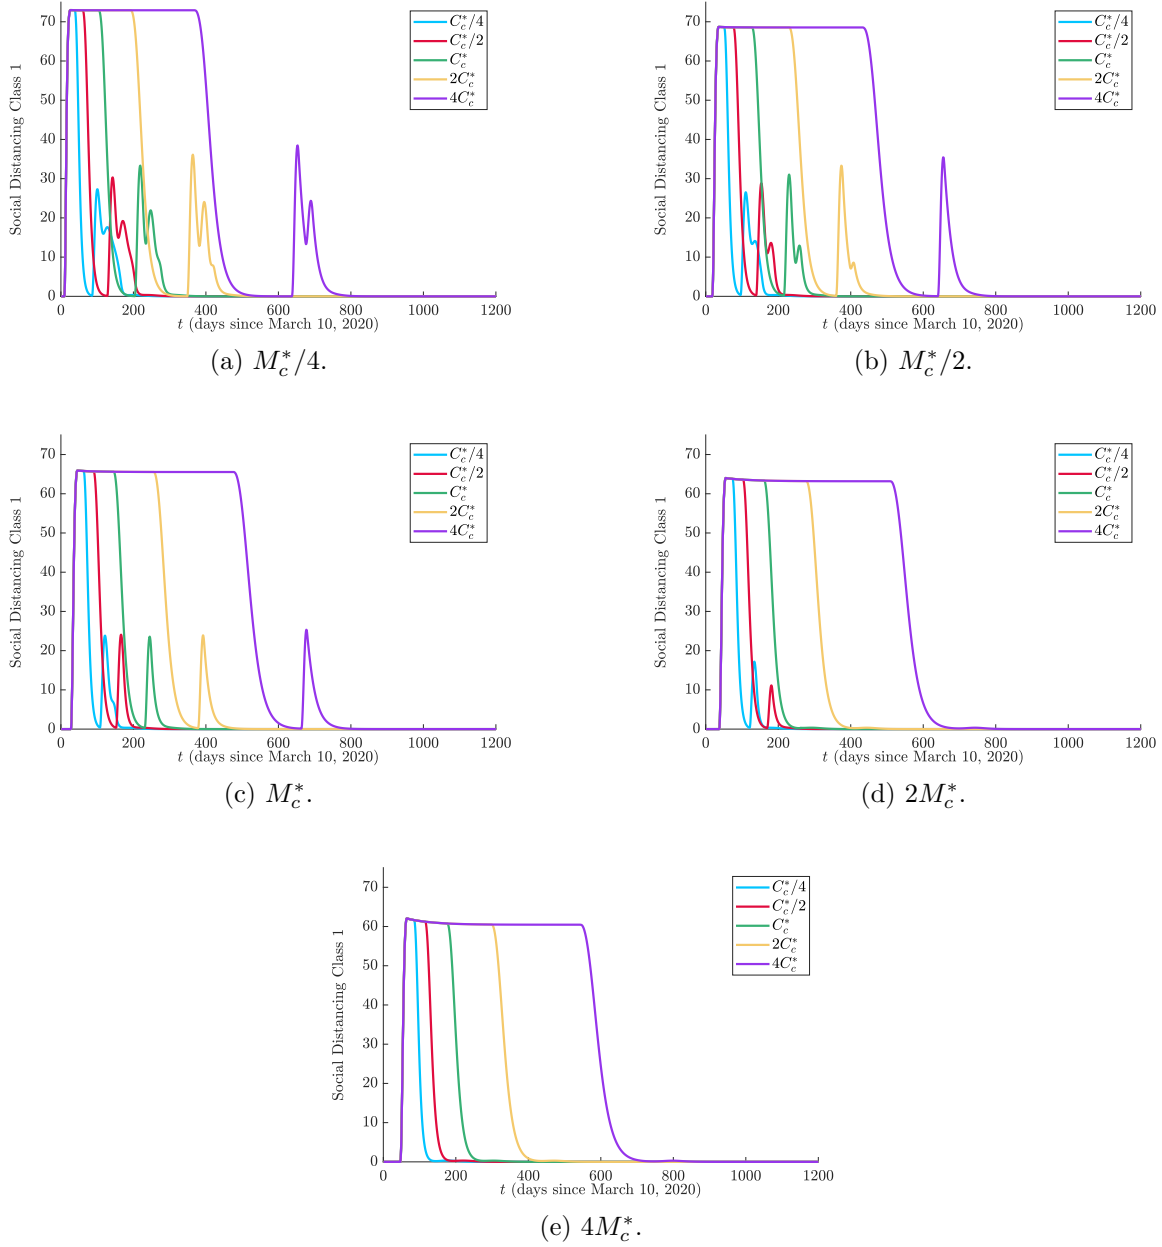

Figure 6: Total people in social distancing class 1 ( $S_1, E_1, P_1, I_{S_1}, I_{A_1}$ ) for different values of  $M_c$  and  $C_c$ .

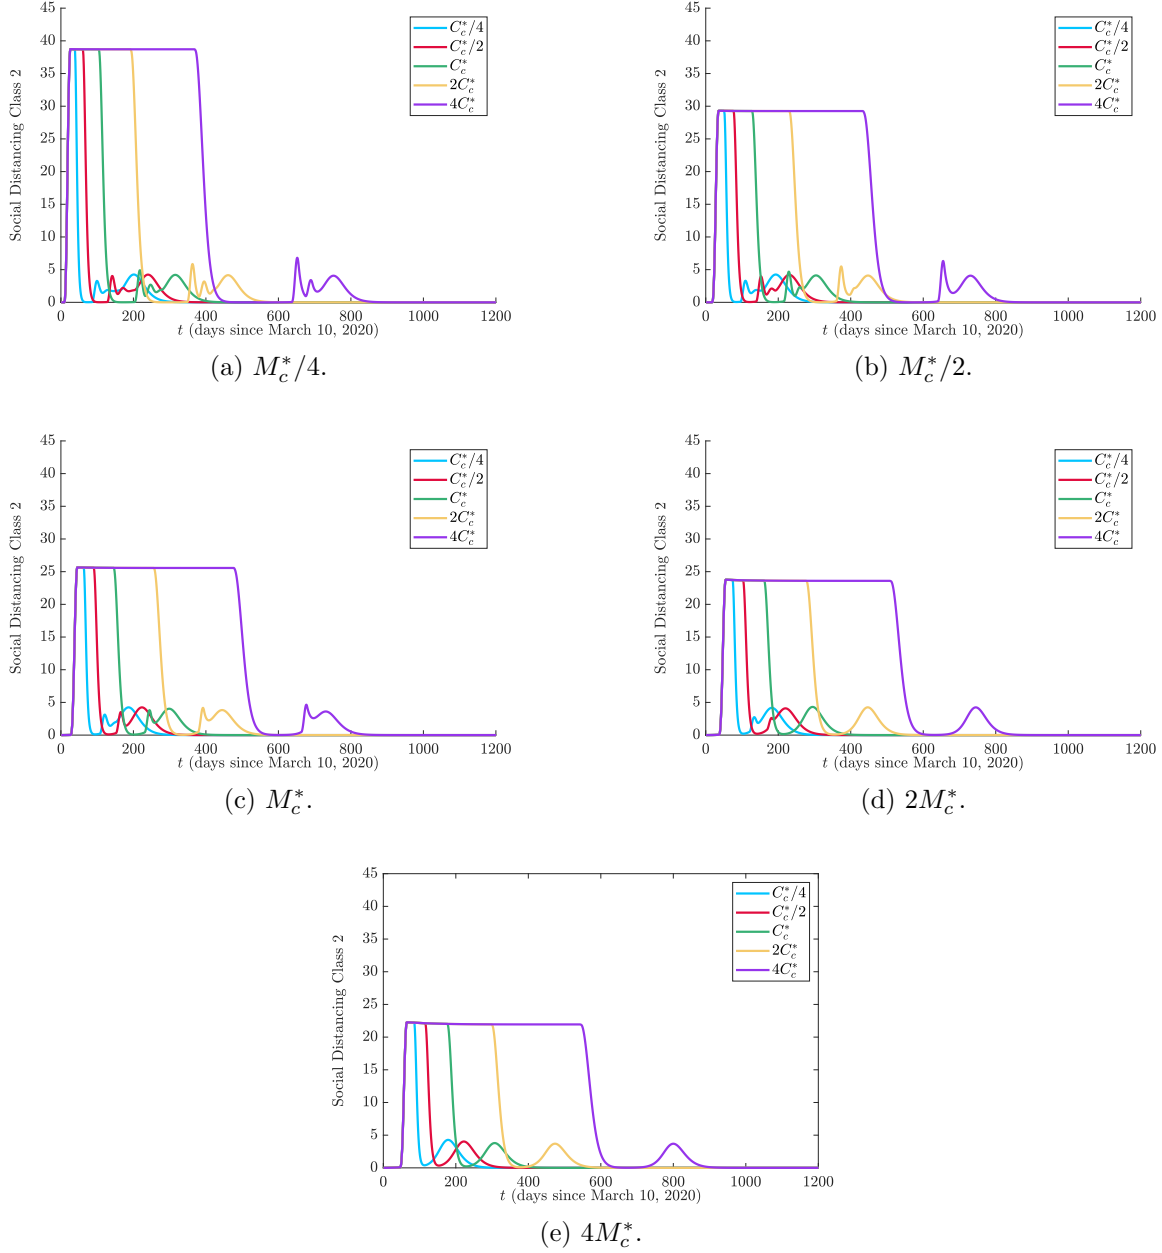

Figure 7: Total people in social distancing class 2 ( $S_2, E_2, P_2, P_M, I_{S_2}, I_{S_M}, I_{A_2}, I_{A_M}$ ) for different values of  $M_c$  and  $C_c$ .

Next, we plot the active cases (tested and actual cases) along with the cost for each of the 25 scenarios considered in Figure 8 using the modified relaxation cost (3.1). These are plotted in Figure 8 for all cases of  $\eta = 1/4$ , Figure 9 for all cases of  $\eta = 1/2$ , Figure 10 for all cases of  $\eta = 1$ , Figure 11 for all cases of  $\eta = 2$ , and Figure 12 for all cases of  $\eta = 4$ .



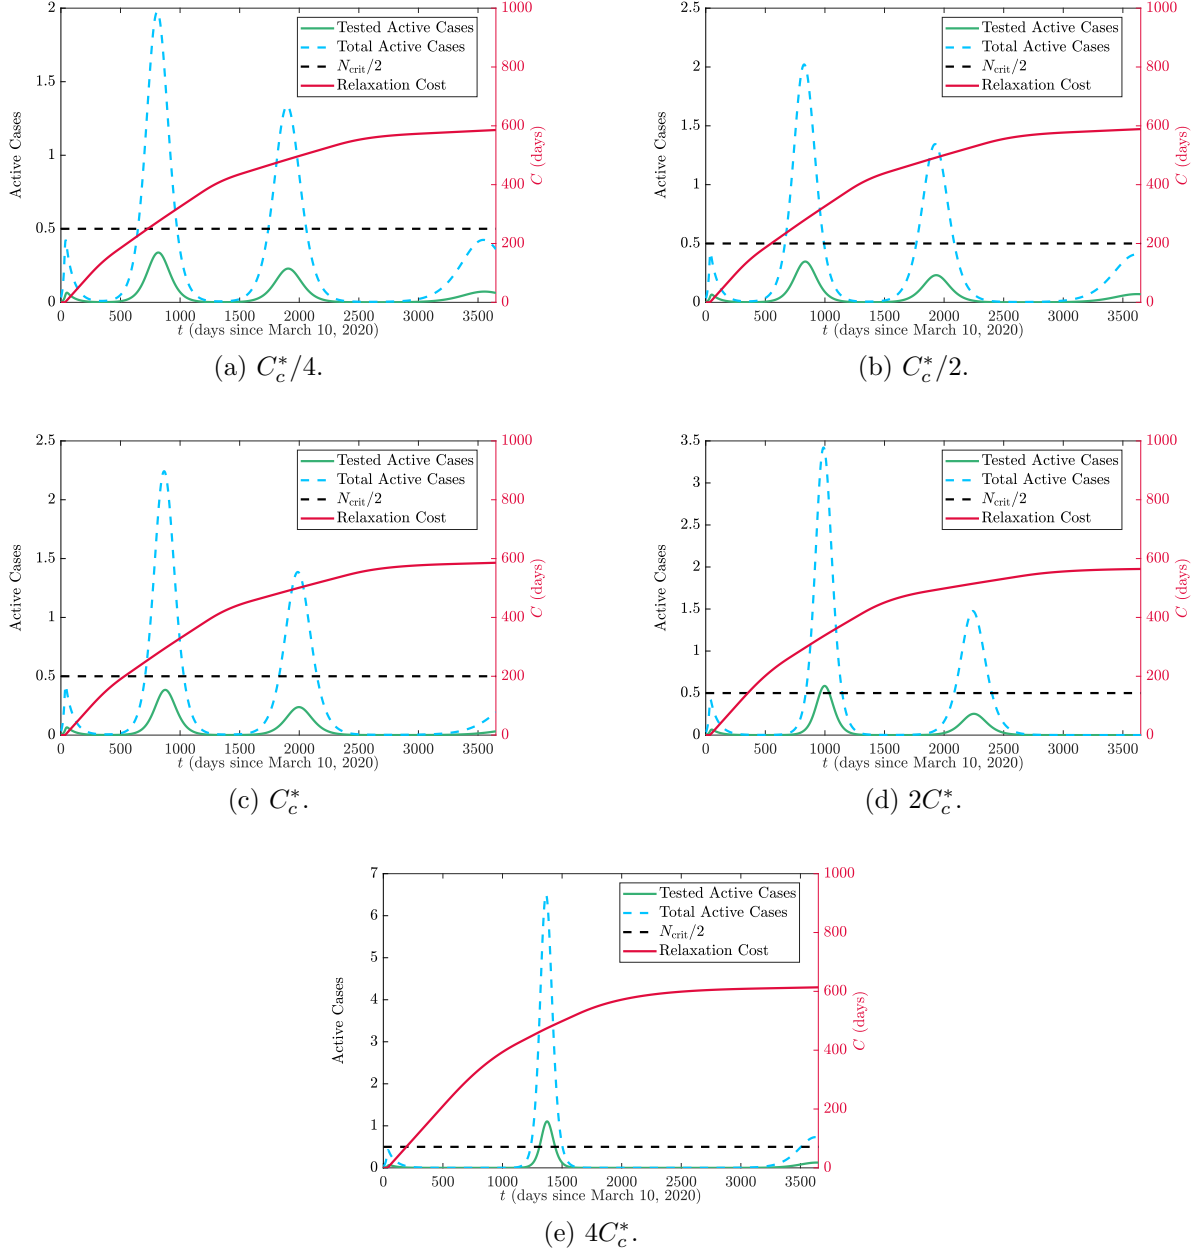

Figure 8: Tested active cases (green solid), total active cases (blue dashed) and relaxation cost (red solid) for  $\eta = 1/4$  and varying  $C_c$ . The grey curve represents the baseline case of no implementation of social distancing (and thus no cost) and the black dashed line is the critical threshold  $N_{\text{crit}}/2$ . Case values are scaled by  $N_{\text{crit}}$ .

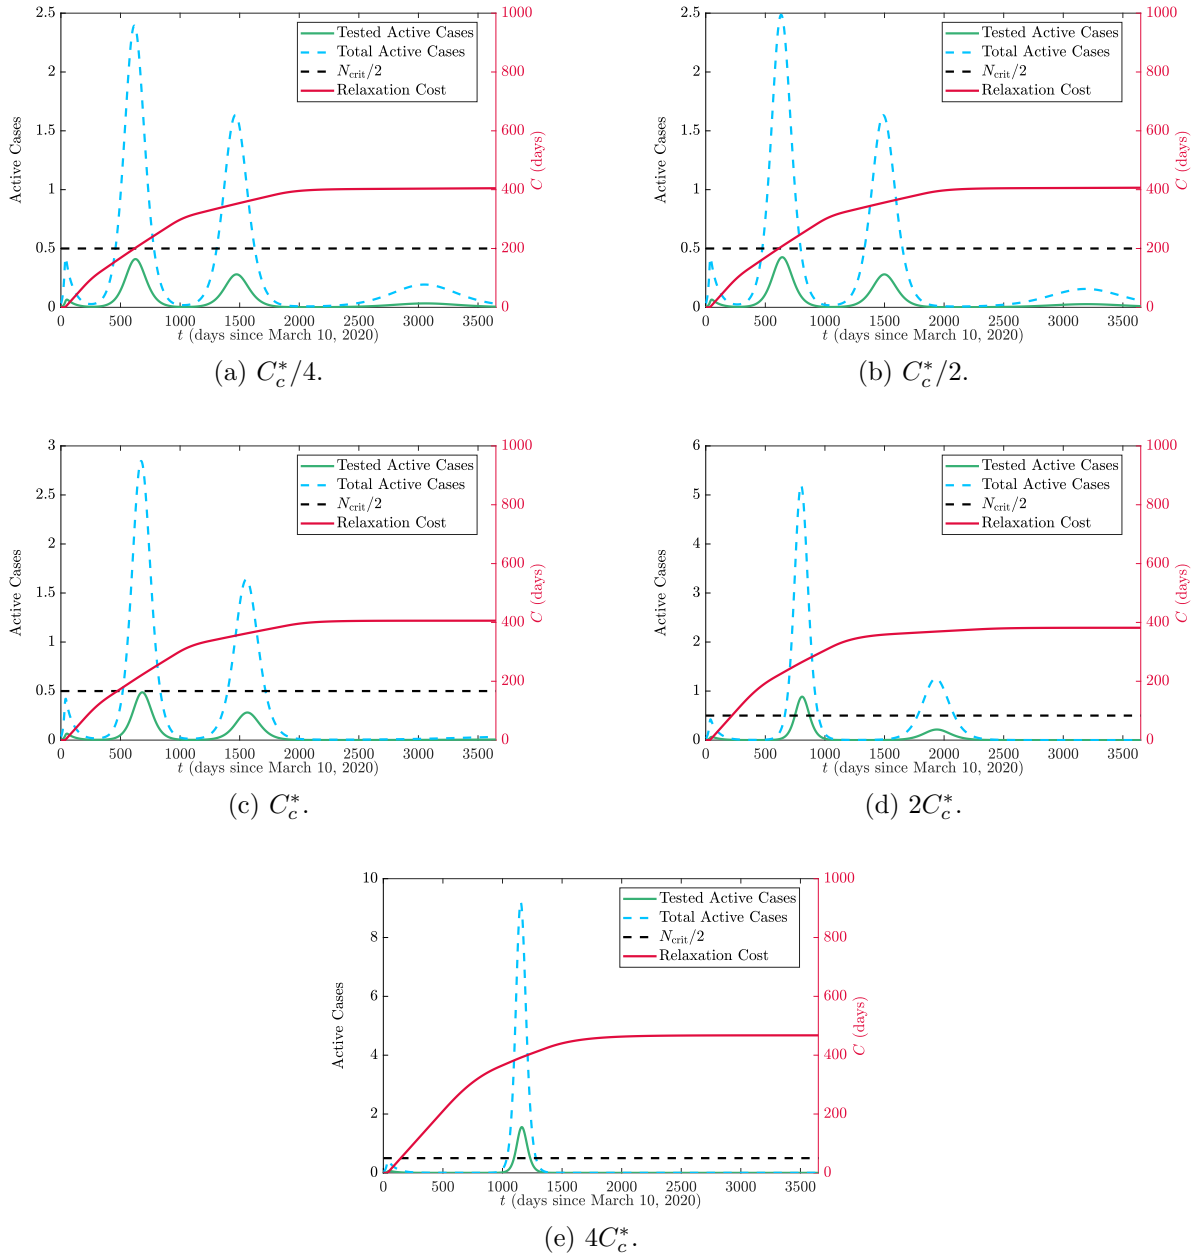

Figure 9: Tested active cases (green solid), total active cases (blue dashed) and relaxation cost (red solid) for  $\eta = 1/2$  and varying  $C_c$ . The grey curve represents the baseline case of no implementation of social distancing (and thus no cost) and the black dashed line is the critical threshold  $N_{\text{crit}}/2$ . Case values are scaled by  $N_{\text{crit}}$ .

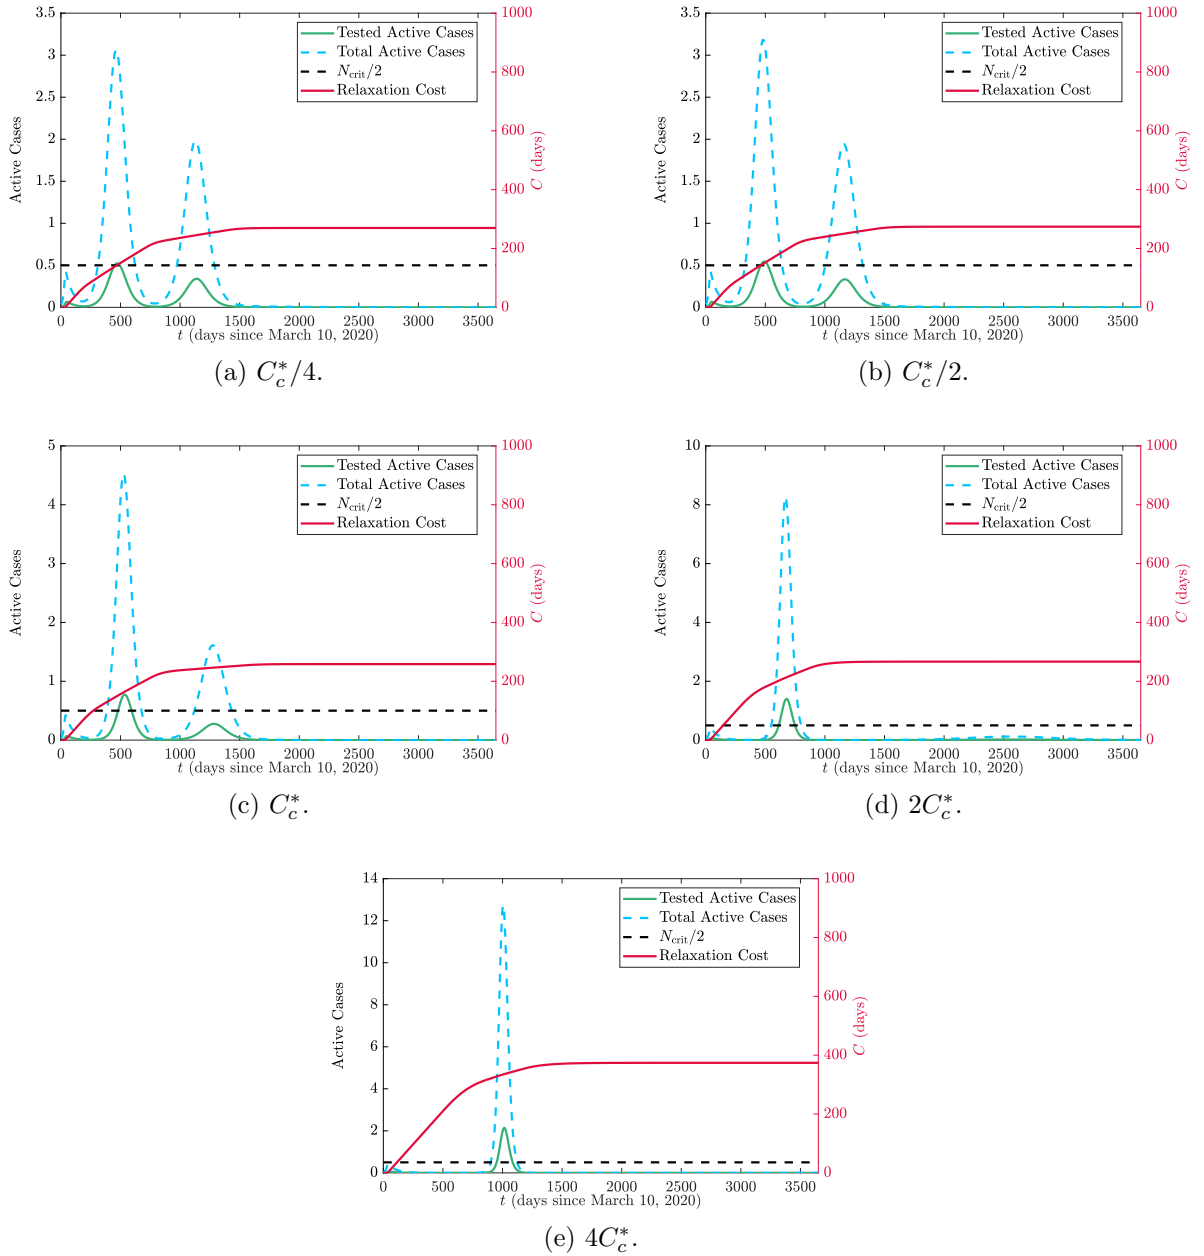

Figure 10: Tested active cases (green solid), total active cases (blue dashed) and relaxation cost (red solid) for  $\eta = 1$  and varying  $C_c$ . The grey curve represents the baseline case of no implementation of social distancing (and thus no cost) and the black dashed line is the critical threshold  $N_{\text{crit}}/2$ . Case values are scaled by  $N_{\text{crit}}$ .

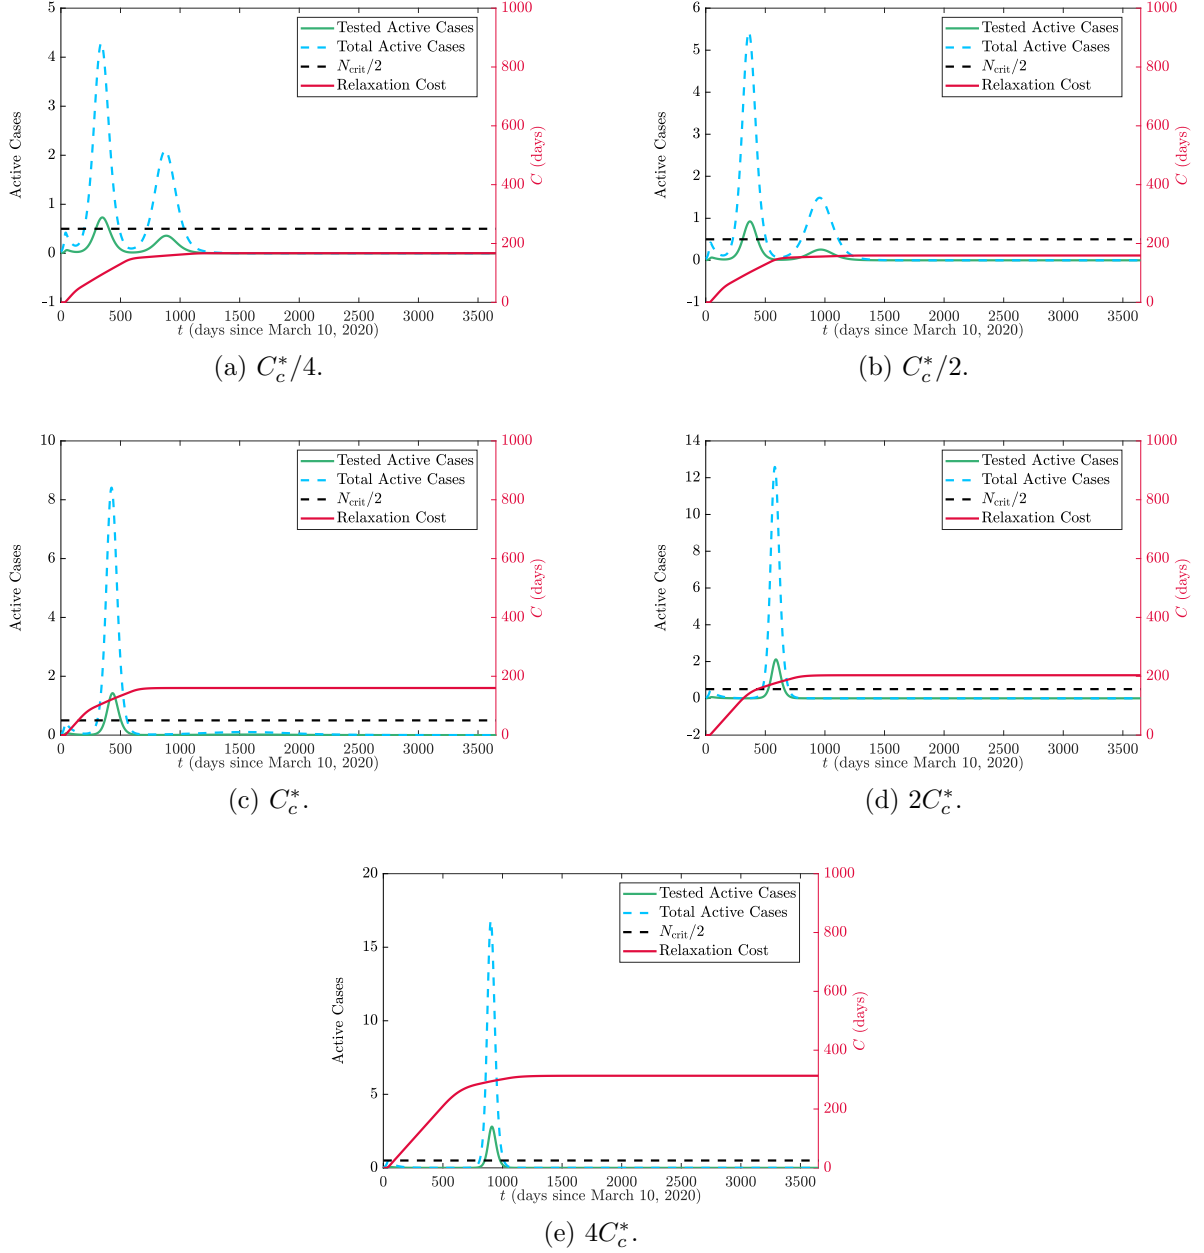

Figure 11: Tested active cases (green solid), total active cases (blue dashed) and relaxation cost (red solid) for  $\eta = 2$  and varying  $C_c$ . The grey curve represents the baseline case of no implementation of social distancing (and thus no cost) and the black dashed line is the critical threshold  $N_{\text{crit}}/2$ . Case values are scaled by  $N_{\text{crit}}$ .

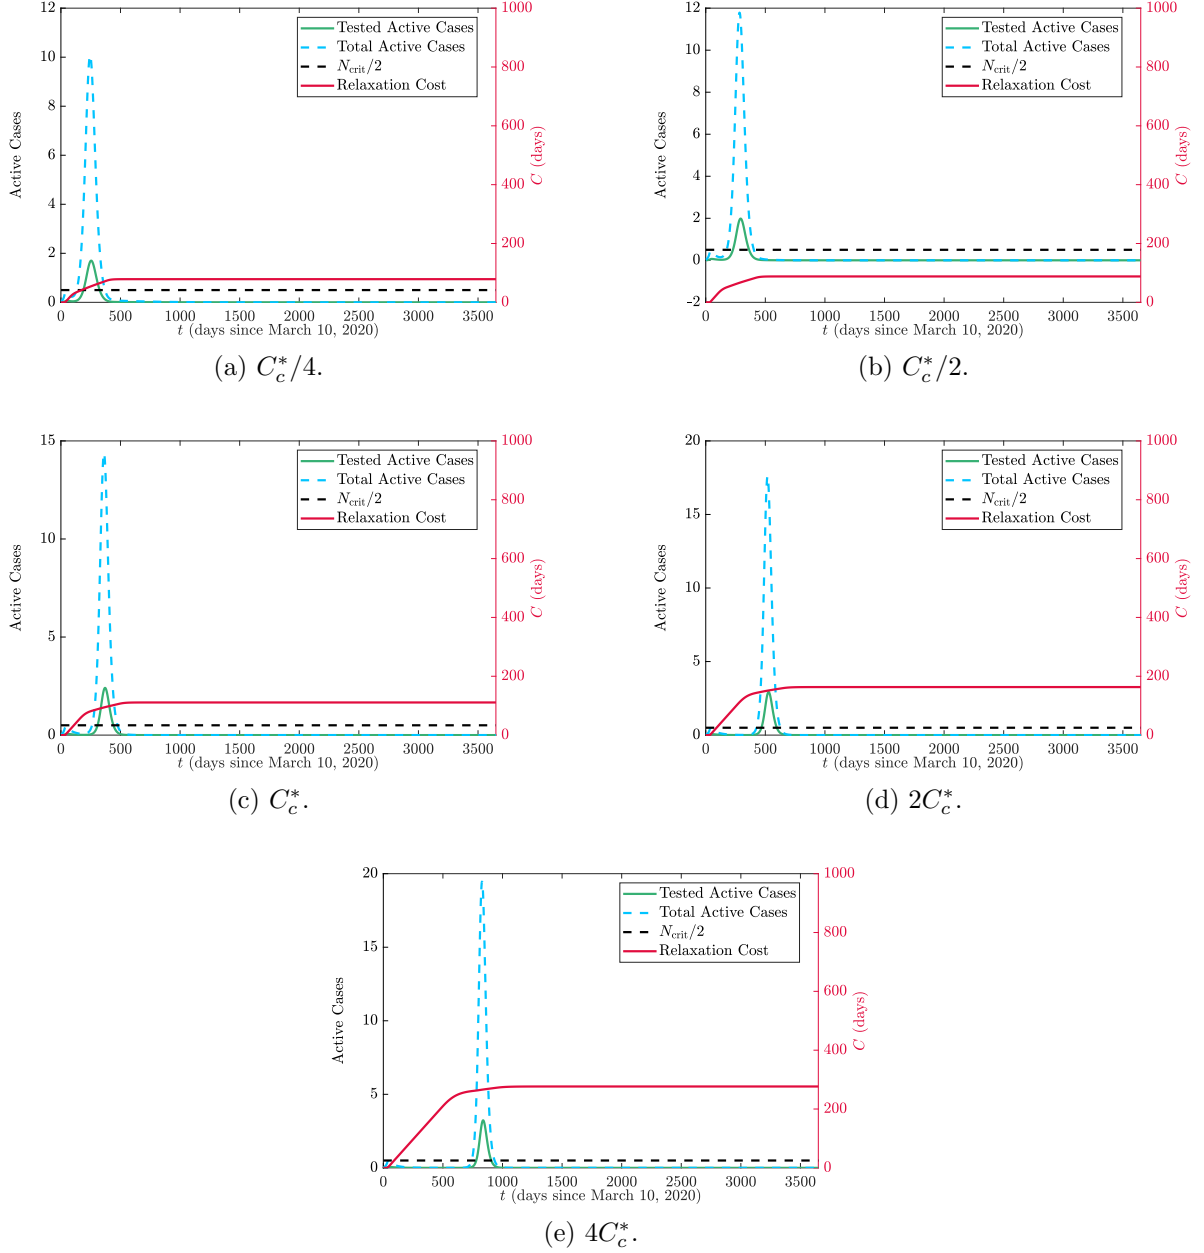

Figure 12: Tested active cases (green solid), total active cases (blue dashed) and relaxation cost (red solid) for  $\eta = 4$  and varying  $C_c$ . The grey curve represents the baseline case of no implementation of social distancing (and thus no cost) and the black dashed line is the critical threshold  $N_{\text{crit}}/2$ . Case values are scaled by  $N_{\text{crit}}$ .

We also plot the populations in each of the two social distancing classes for each of the 25 scenarios considered in Figure 8 of the main text. These are plotted in Figure 13 for social distancing class 1 and Figure 14 for social distancing class 2.

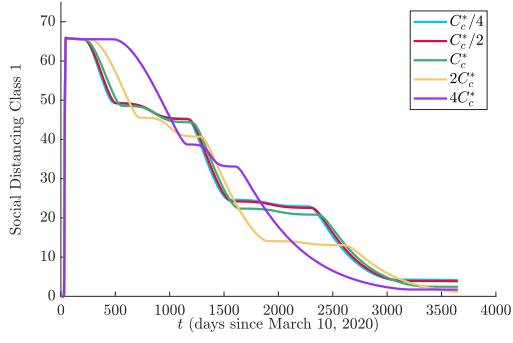

(a)  $\eta/4$ .

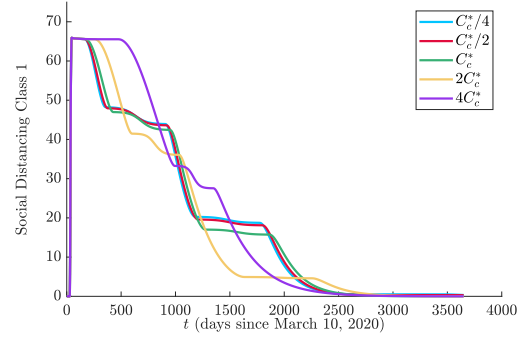

(b)  $\eta/2$ .

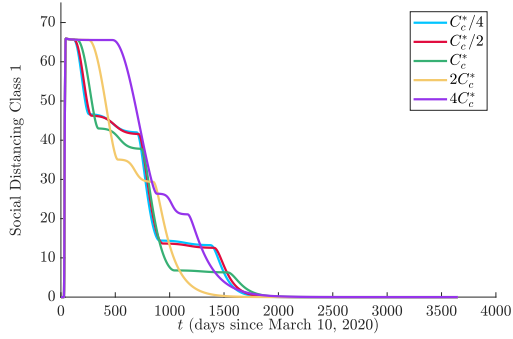

(c)  $\eta$ .

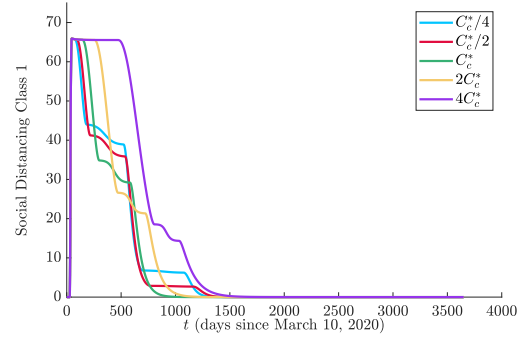

(d)  $2\eta$ .

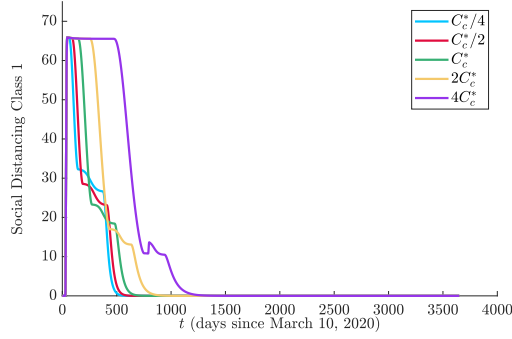

(e)  $4\eta$ .

Figure 13: Total people in social distancing class 1 ( $S_1, E_1, P_1, I_{S_1}, I_{A_1}$ ) for different values of  $\eta$  and  $C_c$ .

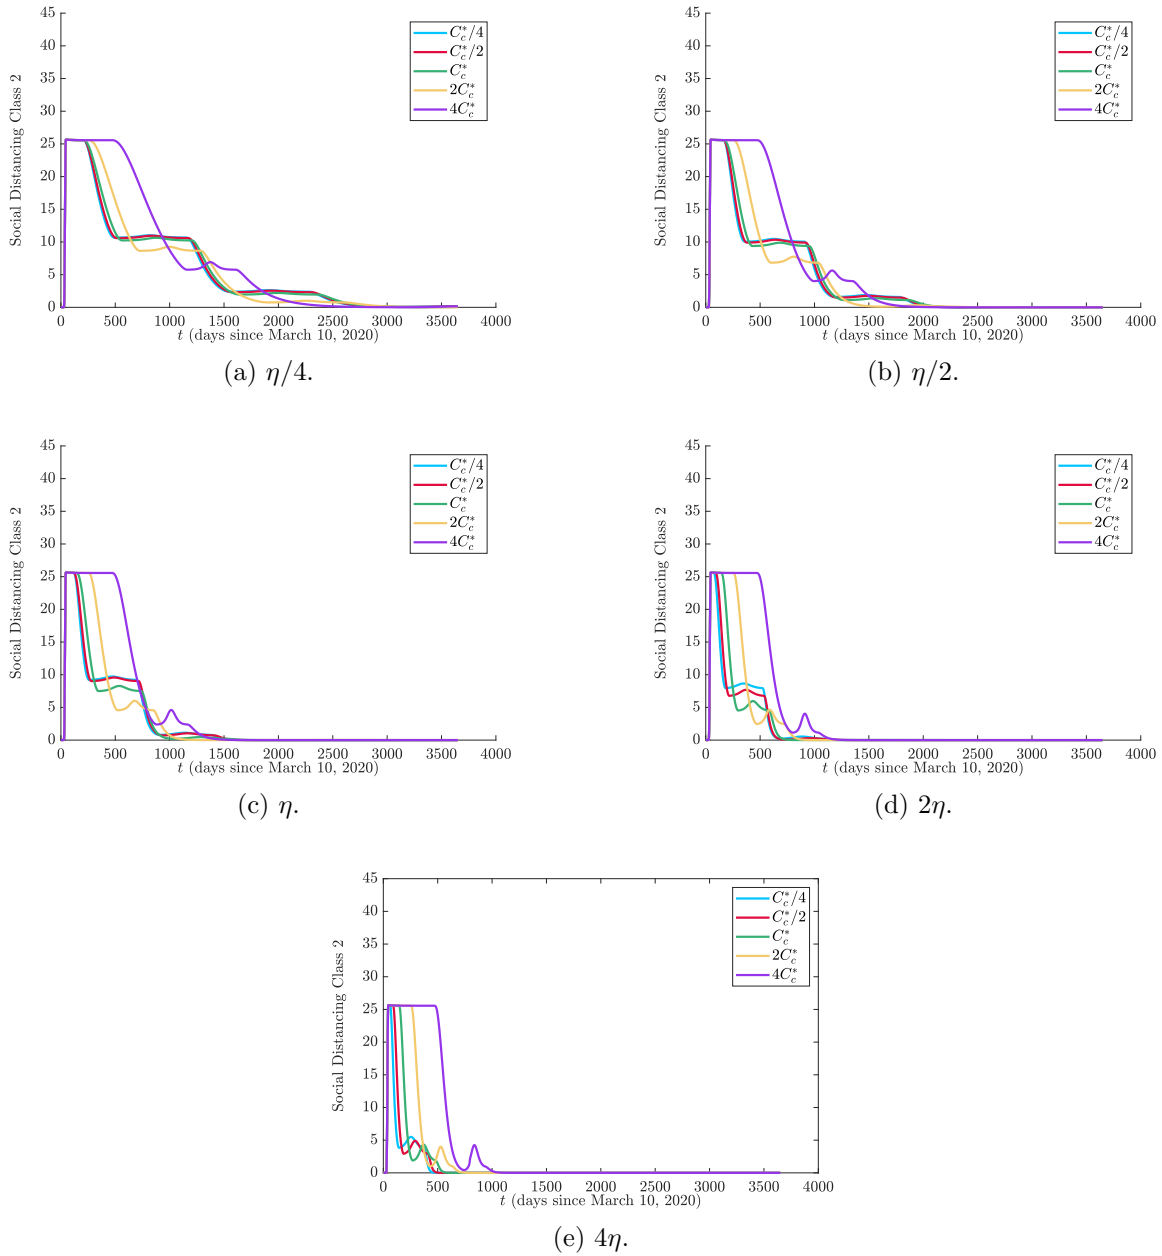

Figure 14: Total people in social distancing class 2 ( $S_2, E_2, P_2, P_M, I_{S_2}, I_{S_M}, I_{A_2}, I_{A_M}$ ) for different values of  $\eta$  and  $C_c$ .
